# Supplementary material for: The size effect on the energy transfer in Bi3+–Eu3+ co-doped GdVO4 nanocrystals
Source: Royal Society of Chemistry journal article supplement (doi:10.1039/c6tc04660f), 2017-01-01
Supplement: c6tc04660f1.pdf [file c6tc04660f1.pdf]

Electronic Supplementary Information

**The size effect on the energy transfer in Bi<sup>3+</sup>-Eu<sup>3+</sup> co-doped GdVO<sub>4</sub> nanocrystals**

*K. Lenczewska,<sup>\*a</sup> Y. Gerasymchuk,<sup>a</sup> N. Vu,<sup>b</sup> N.Q. Liem,<sup>b</sup> G. Boulon<sup>c</sup> and D. Hreniak<sup>\*a</sup>*

<sup>a</sup> Institute of Low Temperature and Structural Research, Polish Academy of Sciences, Wrocław, Poland.

<sup>b</sup> Institute of Materials Science, VAST, 18 Hoang-Quoc-Viet, Hanoi, Vietnam

<sup>c</sup> Institute Light Matter (ILM), UMR5306 CNRS-Université Lyon1, Université de Lyon, Bât. Kastler, 69622 Villeurbanne, France

\* E-mail: K.Lenczewska@int.pan.wroc.pl, D.Hreniak@int.pan.wroc.pl

**Table S1** The dependence of the <sup>5</sup>D<sub>0</sub> level of Eu<sup>3+</sup> luminescence lifetime ( $\tau$ ) and quantum yield ( $\eta$ ) upon different excitation wavelength ( $\lambda_{\text{exc}}$ ) on concentration of Bi<sup>3+</sup> in GdVO<sub>4</sub>: 5 mol% Eu<sup>3+</sup>, x mol% Bi<sup>3+</sup> annealed at 800°C

| $x$ (mol%) | $\lambda_{\text{exc}} = 266$ nm<br>(O <sup>2-</sup> - V <sup>5+</sup> ) CT |            | $\lambda_{\text{exc}} = 330$ nm<br>(Bi <sup>3+</sup> - V <sup>5+</sup> ) CT |            | $\lambda_{\text{exc}} = 396$ nm<br>Eu <sup>3+</sup> <i>f-f</i> |            |
|------------|----------------------------------------------------------------------------|------------|-----------------------------------------------------------------------------|------------|----------------------------------------------------------------|------------|
|            | $\tau$ (ms)                                                                | $\eta$ (%) | $\tau$ (ms)                                                                 | $\eta$ (%) | $\tau$ (ms)                                                    | $\eta$ (%) |
| 0          | 0.80                                                                       | 3.4        | -                                                                           | -          | 0.75                                                           | 0.3        |
| 1          | 1.07                                                                       | 3.4        | 0.84                                                                        | 7.0        | 0.52                                                           | 1.4        |
| 10         | 0.68                                                                       | 2.9        | 0.59                                                                        | 10.7       | 0.63                                                           | 1.1        |

**Table S2** The dependence of the <sup>5</sup>D<sub>0</sub> level of Eu<sup>3+</sup> luminescence lifetime ( $\tau$ ) and quantum yield ( $\eta$ ) upon different excitation wavelength ( $\lambda_{\text{exc}}$ ) on annealing temperature ( $t_{\text{anneal}}$ ) in GdVO<sub>4</sub>: 5 mol% Eu<sup>3+</sup>, 1 mol% Bi<sup>3+</sup>

| $t_{\text{anneal}}$ (°C) | $\lambda_{\text{exc}} = 266$ nm<br>(O <sup>2-</sup> - V <sup>5+</sup> ) CT |            | $\lambda_{\text{exc}} = 330$ nm<br>(Bi <sup>3+</sup> - V <sup>5+</sup> ) CT |            | $\lambda_{\text{exc}} = 396$ nm<br>Eu <sup>3+</sup> <i>f-f</i> |            |
|--------------------------|----------------------------------------------------------------------------|------------|-----------------------------------------------------------------------------|------------|----------------------------------------------------------------|------------|
|                          | $\tau$ (ms)                                                                | $\eta$ (%) | $\tau$ (ms)                                                                 | $\eta$ (%) | $\tau$ (ms)                                                    | $\eta$ (%) |
| 750                      | 1.16                                                                       | 2.6        | 0.92                                                                        | 5.2        | 0.59                                                           | 1.2        |
| 800                      | 1.07                                                                       | 3.4        | 0.84                                                                        | 7.0        | 0.52                                                           | 1.4        |
| 900                      | 0.35                                                                       | 4.2        | 0.59                                                                        | 10.7       | 0.64                                                           | 3.4        |
